# Supplementary material for: Spore-autonomous fluorescent protein expression identifies meiotic chromosome mis-segregation as the principal cause of hybrid sterility in yeast
Source: PubMed Central journal article supplement (PMC6258379; doi:10.1371/journal.pbio.2005066), 2018-11-12

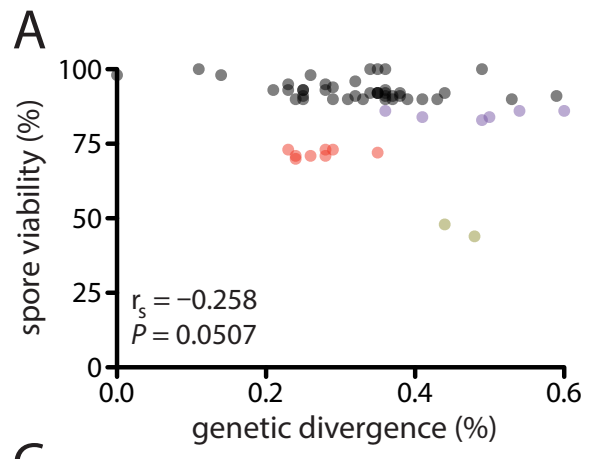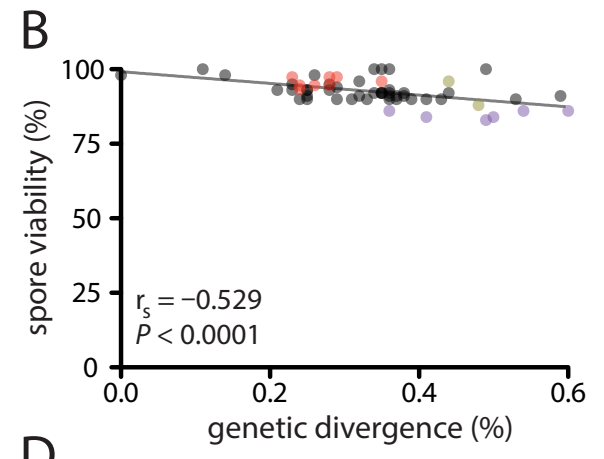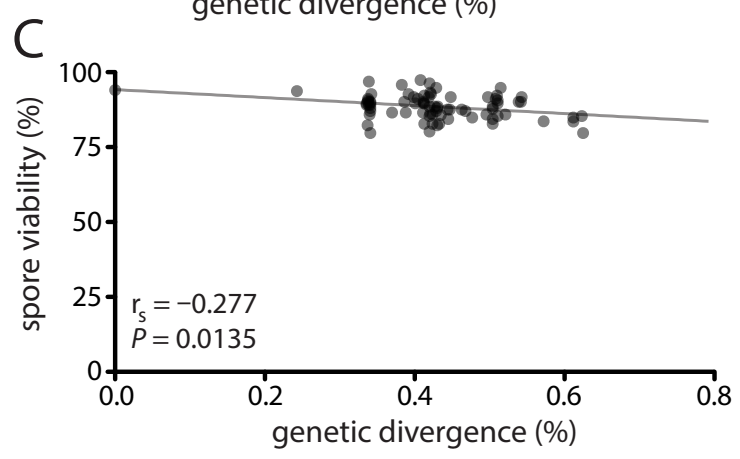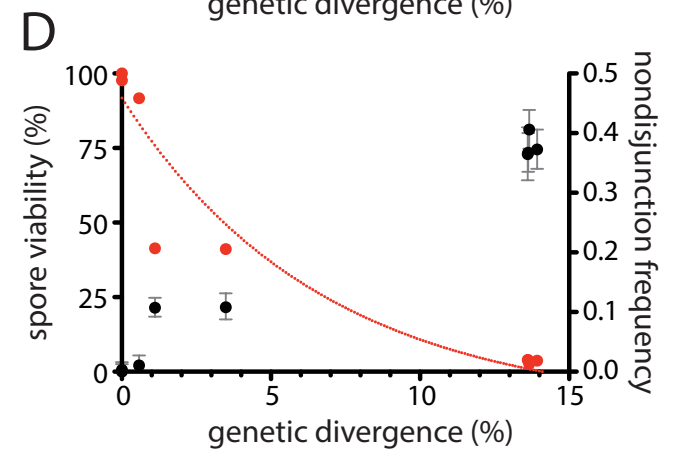

Supplement: pbio.2005066.s002.pdf [file pbio.2005066.s002.pdf]
