# Supplementary material for: Spore-autonomous fluorescent protein expression identifies meiotic chromosome mis-segregation as the principal cause of hybrid sterility in yeast
Source: PubMed Central journal article supplement (PMC6258379; doi:10.1371/journal.pbio.2005066), 2018-11-12
Supplement: pbio.2005066.s006.pdf [file pbio.2005066.s006.pdf]

## 1 **Supporting Text**

### 2 **Strain construction**

3 A diagram of the general strain construction protocol is included in S4 Fig. *S. cerevisiae* Y55  
4 and *S. paradoxus* N17 strains were constructed starting from haploid prototrophs (Y55:  
5 MAT $\alpha$  = YDP0302, MAT $\alpha$  = YDP1275; N17: MAT $\alpha$  = YDP1276, MAT $\alpha$  = YDP0742). To  
6 allow selection for the integration of the spore-autonomous fluorescent protein expression  
7 constructs, we first knocked out the endogenous *LEU2* and *URA3* loci in one or both mating  
8 types: *LEU2* was replaced with *HYGMX* amplified from plasmid p167 using primers  
9 0899/0900 (Y55: generating MAT $\alpha$  strain YDP1307 and MAT $\alpha$  strain YDP1303) or  
10 0897/0898 (N17: generating MAT $\alpha$  strain YDP1295) while *URA3* was replaced with *KANMX*  
11 from plasmid p161 using primers 0889/0890 (Y55: generating MAT $\alpha$  strain YDP1277 and  
12 MAT $\alpha$  strain YDP1285) or primers 881/882 (N17: generating MAT $\alpha$  strain YDP1289 and  
13 MAT $\alpha$  strain YDP1281). For *S. paradoxus* N44 and YPS138, we started with MAT $\alpha$  haploids  
14 generated as part of the *Saccharomyces* Genome Resequencing Project (SGRP; [S8]) that  
15 already had *URA3* replaced with *KANMX* and *HO* replaced with *HYGMX* (N44 = NCYC3687;  
16 YPS138 = NCYC3684). To allow selection of diploids formed with N17 and Y55, we swapped  
17 the *ura3::KANMX* marker with *NATNT2* from plasmid p30346 (EUROSCARF) using primers  
18 1057/1058 (N44: generating strain YDP1493) or 1018/1019 (YPS138: generating strain  
19 YDP1487). We subsequently replaced the *ho::HYGMX* markers in these strains with *KANMX*  
20 using primers 0255/0256 from plasmid p161 in both N44 (generating strain YDP1500) and  
21 YPS138 (generating strain YDP1470). For *S. cerevisiae* S288C, we started with MAT $\alpha$   
22 *ura3::HYGMX* haploid strain YDP0972, and swapped with *HYGMX* marker with *NATMX*  
23 using primers 0255/256 from plasmid p178 to generate strain YGL3.

24 Fluorescent proteins were placed under the expression of two different promoters. We first  
25 replaced the YKL050c ORF in Y55 and N17 with promoterless fluorescent constructs:  
26 GFP\_*URA3* was amplified from plasmid pSK726 and RFP\_*LEU2* was amplified from plasmid  
27 pSK691 (both gifts from Scott Keeney) as described in S1 Table. Genomic DNA extracted  
28 from these strains was then used as a template to transfer fluorescent constructs under the

29 endogenous YKL050c promoter ( $P_{YKL050c}$ -GFP\_URA3 and  $P_{YKL050c}$ -RFP\_LEU2) to a different  
30 chromosome (either III, VII, VIII or IX, see panel A in S1 Table). Although fluorescent protein  
31 expression under endogenous promoters was improved compared to heterologous  
32 promoters, it remained difficult to score in *S. paradoxus* and interspecific hybrids.  
33 Consequently, we switched to the *DIT1* (YDR403w) promoter, which we found could be  
34 scored with much greater reliability. The *DIT1* ORF in Y55, S288C, N17, N44, and YPS138  
35 was replaced with a promoterless fluorescent construct as described in panel B of S1 Table.  
36 Genomic DNA from these strains was then used as a template to transfer fluorescent  
37 constructs under the *DIT1* promoter to each chromosome (except for S288C and YPS138  
38 where we only used chromosomes I, VII, and XII). Loci chosen for integration on each  
39 chromosome were located near the centromere (but were not directly apposed to minimize  
40 influence of the fluorescent construct on centromere function), had no annotated function  
41 related to viability, meiosis, or chromosome segregation, and were not associated with  
42 reduced sporulation or germination efficiency [S9,S10]. Correct integration of fluorescent  
43 constructs at desired loci was confirmed by diagnostic PCR (primer sequences available on  
44 request).

45

#### 46 **Anti-recombination**

47 We created meiotic null mutants of *SGS1* by replacing the endogenous promoter with the  
48 meiotically silent *CLB2* promoter, as described in [S11]. The NATNT2 cassette from plasmid  
49 p30346 (EUROSCARF) was inserted upstream of the *CLB2* promoter in Y55 strain YDP1275  
50 (creating strain YDP1478) and in N17 strain YDP1276 (creating strain YDP1479) using  
51 primers P1013/1015 and P1012/1014, respectively. Strains YDP1478 and YDP1479 were  
52 then used as species-specific templates to replace the endogenous *SGS1* promoter with the  
53 appropriate NATNT2-linked *CLB2* promoter, using primers P1020/1021 (for Y55) and  
54 P1022/1038 (for N17), in strains with fluorescent-marked chromosomes (panel B in S1  
55 Table). Strains of both mating types in N17 and Y55 with fluorescent markers on  
56 chromosomes II, VII, XII, and XIII (YDP1405, YDP1392, YDP1430, YDP1418, YDP1410,

57 YDP1397, YDP1402, YDP1389, YDP1427, YDP1415, YDP1411, YDP1398, YDP1435,  
58 YDP1436, YDP1424) were converted to *pCLB2\_SGS1* (YDP1494, YDP1495, YDP1496,  
59 YDP1497, YGL13, YGL12, YDP1501, YDP1502, YDP1503, YDP1504, YDP1509, YDP1510,  
60 YGL14, YDP1511, YDP1512, respectively).

61

## 62 **Genome alignments and % identity**

63 Genomes for *S. cerevisiae* strains S288C and SK1 and *S. paradoxus* strains CBS432 and  
64 N44 were downloaded from [https://yjx1217.github.io/Yeast\\_PacBio\\_2016/data/](https://yjx1217.github.io/Yeast_PacBio_2016/data/) and full  
65 genome alignments were performed using Mauve [S12] implemented in Geneious 10.2.3.  
66 Distances of the *S. cerevisiae* genomes from the 100-genomes project [S2] to S288C  
67 described in S2 Fig panel C and S1 Data were calculated using Geneious 10.2.3 after being  
68 aligned using REALPHY [S5].

69 A. *YKL050c* promoter-driven spore-autonomous fluorescence

70

| chr  | locus           | Y55α                            |                                | Y55a                           |                                 | N17α                            |                                | N17a                            |
|------|-----------------|---------------------------------|--------------------------------|--------------------------------|---------------------------------|---------------------------------|--------------------------------|---------------------------------|
|      |                 | YDP1307                         | YDP1277                        | YDP1303                        | YDP1285                         | YDP1295                         | YDP1289                        | YDP1281                         |
| III  | <i>YCR007c</i>  | YDP1373<br>0948/0910<br>YDP1344 |                                |                                | YDP1369<br>0948/0910<br>YDP1350 | YDP1365<br>0947/0912<br>YDP1342 |                                | YDP1361<br>0947/0912<br>YDP1348 |
| VII  | <i>YGL006-7</i> | YDP1374<br>0935/0936<br>YDP1344 |                                |                                | YDP1370<br>0935/0936<br>YDP1350 | YDP1366<br>0933/0934<br>YDP1342 |                                | YDP1362<br>0933/0934<br>YDP1348 |
| VIII | <i>YHR007cA</i> | YDP1375<br>0950/0908<br>YDP1344 |                                |                                | YDP1371<br>0950/0908<br>YDP1350 | YDP1367<br>0949/0906<br>YDP1342 |                                | YDP1363<br>0949/0906<br>YDP1348 |
| IX   | <i>YIL002wA</i> | YDP1376<br>0939/0940<br>YDP1344 |                                |                                | YDP1372<br>0939/0940<br>YDP1350 | YDP1368<br>0937/0938<br>YDP1342 |                                | YDP1364<br>0937/0938<br>YDP1348 |
| XI   | <i>YKL050c</i>  |                                 | YDP1350<br>0920/0921<br>pSK726 | YDP1344<br>0920/0921<br>pSK691 | YDP1352<br>0920/0921<br>pSK726  | YDP1342<br>0922/0923<br>pSK691  | YDP1346<br>0922/0923<br>pSK726 | YDP1348<br>0922/0923<br>pSK726  |

71

72

73 B. *DIT1* (*YDR403W*) promoter-driven spore-autonomous fluorescence

74

| chr  | locus                         | S288Ca                      | Y55α                            | Y55a                            |                                | N17α                            |                                | N17a                            | N44a                            | YPS138a                         |
|------|-------------------------------|-----------------------------|---------------------------------|---------------------------------|--------------------------------|---------------------------------|--------------------------------|---------------------------------|---------------------------------|---------------------------------|
|      |                               | YGL3                        | YDP1307                         | YDP1285                         | YDP1303                        | YDP1295                         | YDP1289                        | YDP1281                         | YDP1500                         | YDP1470                         |
| I    | <i>YAL018c</i>                | YGL8<br>1030/1031s<br>YGL5  | YDP1491<br>1030/1031<br>YDP1343 | YDP1490<br>1030/1031<br>YDP1351 |                                | YDP1489<br>1024/1025<br>YDP1341 |                                | YDP1488<br>1024/1025<br>YDP1347 | YDP1526<br>1067/1025<br>YDP1499 | YDP1513<br>1024/1025<br>YDP1498 |
| II   | <i>YBL029w</i>                |                             | YDP1389<br>0958/0959<br>YDP1343 | YDP1402<br>0958/0959<br>YDP1351 |                                | YDP1415<br>0956/0957<br>YDP1341 |                                | YDP1427<br>0956/0957<br>YDP1347 | YDP1527<br>1068/1069<br>YDP1499 |                                 |
| III  | <i>YCR007c</i>                |                             | YDP1390<br>0961/0910<br>YDP1343 | YDP1403<br>0961/0910<br>YDP1351 |                                | YDP1416<br>0960/0912<br>YDP1341 |                                | YDP1428<br>0960/0912<br>YDP1347 | YDP1528<br>1070/1071<br>YDP1499 |                                 |
| IV   | <i>YDR403w</i><br><i>DIT1</i> | YGL5<br>0916/0917<br>pSK726 | YDP1349<br>0916/0917<br>pSK726  | YDP1351<br>0916/0917<br>pSK726  | YDP1343<br>0916/0917<br>pSK691 | YDP1341<br>0918/0919<br>pSK691  | YDP1345<br>0918/0919<br>pSK726 | YDP1347<br>0918/0919<br>pSK726  | YDP1529<br>1059/1060<br>pSK726  | YDP1498<br>1036/1037<br>pSK726  |
| V    | <i>YER004w</i>                |                             | YDP1391<br>0963/0932<br>YDP1343 | YDP1404<br>0963/0932<br>YDP1351 |                                | YDP1417<br>0962/0930<br>YDP1341 |                                | YDP1429<br>0962/0930<br>YDP1347 | YDP1530<br>1072/0930<br>YDP1499 |                                 |
| VI   | <i>YFR006w</i>                |                             | YDP1482<br>0966/0967<br>YDP1343 | YDP1483<br>0966/0967<br>YDP1351 |                                | YDP1480<br>0964/0965<br>YDP1341 |                                | YDP1481<br>0964/0965<br>YDP1347 | YDP1559<br>1097/1099<br>YDP1499 |                                 |
| VII  | <i>YGL006-7</i>               | YGL9<br>0969/0936<br>YGL5   | YDP1392<br>0969/0936<br>YDP1343 | YDP1405<br>0969/0936<br>YDP1351 |                                | YDP1418<br>0968/0934<br>YDP1341 |                                | YDP1430<br>0968/0934<br>YDP1347 | YDP1531<br>1073/0934<br>YDP1499 | YDP1521<br>1047/0934<br>YDP1498 |
| VIII | <i>YHR007cA</i>               |                             | YDP1393<br>0971/0908<br>YDP1343 | YDP1406<br>0971/0908<br>YDP1351 |                                | YDP1419<br>0970/0906<br>YDP1341 |                                | YDP1431<br>0970/0906<br>YDP1347 | YDP1532<br>1074/1075<br>YDP1499 |                                 |
| IX   | <i>YIL002wA</i>               |                             | YDP1394<br>0973/0940<br>YDP1343 | YDP1407<br>0973/0940<br>YDP1351 |                                | YDP1420<br>0972/0938<br>YDP1341 |                                | YDP1432<br>0972/0938<br>YDP1347 | YDP1533<br>1076/1077<br>YDP1499 |                                 |
| X    | <i>YLO16w</i>                 |                             | YDP1395<br>0976/0975<br>YDP1343 | YDP1408<br>0976/0975<br>YDP1351 |                                | YDP1421<br>0974/0975<br>YDP1341 |                                | YDP1433<br>0974/0975<br>YDP1347 | YDP1534<br>1078/0975<br>YDP1499 |                                 |
| XI   | <i>YKR005c</i>                |                             | YDP1396<br>0978/0997<br>YDP1343 | YDP1409<br>0978/0997<br>YDP1351 |                                | YDP1422<br>0977/0996<br>YDP1341 |                                | YDP1434<br>0977/0996<br>YDP1347 | YDP1535<br>1079/1080<br>YDP1499 |                                 |
| XII  | <i>YLR004c</i>                | YGL11<br>0981/0980<br>YGL5  | YDP1397<br>0981/0980<br>YDP1343 | YDP1410<br>0981/0980<br>YDP1351 |                                | YDP1423<br>0979/0980<br>YDP1341 |                                | YDP1435<br>0979/0980<br>YDP1347 | YDP1536<br>1081/1082<br>YDP1499 | YDP1522<br>1053/0980<br>YDP1498 |
| XIII | <i>YMR003w</i>                |                             | YDP1398<br>0984/0983<br>YDP1343 | YDP1411<br>0984/0983<br>YDP1351 |                                | YDP1424<br>0982/0983<br>YDP1341 |                                | YDP1436<br>0982/0983<br>YDP1347 | YDP1537<br>1083/0983<br>YDP1499 |                                 |
| XIV  | <i>YNL018c</i>                |                             | YDP1399<br>0987/0988<br>YDP1343 | YDP1412<br>0987/0988<br>YDP1351 |                                | YDP1484<br>0985/0986<br>YDP1341 |                                | YDP1485<br>0985/0986<br>YDP1347 | YDP1538<br>1084/0986<br>YDP1499 |                                 |
| XV   | <i>YOL014w</i>                |                             | YDP1400<br>0990/0998<br>YDP1343 | YDP1413<br>0990/0998<br>YDP1351 |                                | YDP1425<br>0989/0998<br>YDP1341 |                                | YDP1437<br>0989/0998<br>YDP1347 | YDP1539<br>1085/0998<br>YDP1499 |                                 |
| XVI  | <i>YPR003c</i>                |                             | YDP1401<br>0993/0992<br>YDP1343 | YDP1414<br>0993/0992<br>YDP1351 |                                | YDP1426<br>0991/0992<br>YDP1341 |                                | YDP1438<br>0991/0992<br>YDP1347 | YDP1540<br>1086/0992<br>YDP1499 |                                 |

75

76 **S1 Table.** Spore-autonomous fluorescent protein expression strains under (A) the *YKL050c*

77 promoter or (B) the *DIT1* promoter. Strains are listed in red if RFP-expressing and green if

78 GFP-expressing and the genes into which these cassettes were integrated are listed in the  
79 locus column. *YGL006-7* indicates the intergenic region between *YGL006W* and *YGL007W*.  
80 Primers (see S3 Table below) used for each transformation are listed below each strain  
81 number, and the source of the template DNA used in each transformation is listed below the  
82 primer numbers.

|     |          |        |              |           |              |             |                |
|-----|----------|--------|--------------|-----------|--------------|-------------|----------------|
| 83  | YDP0302  | Y55    | MAT $\alpha$ | ho        |              |             |                |
| 84  | YDP0972  | S288C  | MATa         | ho        | ura3::HYGMX  |             |                |
| 85  | YGL3     | S288C  | MATa         | ho        | ura3::NATMX  |             |                |
| 86  | YGL5     | S288C  | MATa         | ho        | ura3::HYGMX  |             | dit1::GFP_URA3 |
| 87  | YDP1307  | Y55    | MAT $\alpha$ | ho        |              | leu2::HYGMX |                |
| 88  | YDP1275  | Y55    | MATa         | ho        |              |             |                |
| 89  | YDP1285  | Y55    | MATa         | ho        | ura3::KANMX  |             |                |
| 90  | YDP1303  | Y55    | MATa         | ho        |              | leu2::HYGMX |                |
| 91  | YDP1277  | Y55    | MAT $\alpha$ | ho        | ura3::KANMX  |             |                |
| 92  | YDP1349  | Y55    | MAT $\alpha$ | ho        | ura3::KANMX  |             | dit1::GFP_URA3 |
| 93  | YDR1343  | Y55    | MATa         | ho        |              | leu2::HYGMX | dit1::RFP_LEU2 |
| 94  | YDP1285  | Y55    | MATa         | ho        |              |             |                |
| 95  | YDP1351  | Y55    | MATa         | ho        | ura3::KANMX  |             | dit1::GFP_URA3 |
| 96  | YDP1276  | N17    | MAT $\alpha$ | ho        |              |             |                |
| 97  | YDP1295  | N17    | MAT $\alpha$ | ho        |              | leu2::HYGMX |                |
| 98  | YDP1341  | N17    | MAT $\alpha$ | ho        |              | leu2::HYGMX | dit1::RFP_LEU2 |
| 99  | YDP1289  | N17    | MAT $\alpha$ | ho        | ura3::KANMX  |             |                |
| 100 | YDP1345  | N17    | MAT $\alpha$ | ho        | ura3::KANMX  |             | dit1::GFP_URA3 |
| 101 | YDP0742  | N17    | MATa         | ho        |              |             |                |
| 102 | YDP1281  | N17    | MATa         | ho        | ura3::KANMX  |             |                |
| 103 | YDP1347  | N17    | MATa         | ho        | ura3::KANMX  |             | dit1::GFP_URA3 |
| 104 | NCYC3687 | N44    | MATa         | ho::HYGMX | ura3::KANMX  |             |                |
| 105 | YDP1493  | N44    | MATa         | ho::HYGMX | ura3::NATNT2 |             |                |
| 106 | YDP1499  | N44    | MATa         | ho::HYGMX | ura3::NATNT2 |             | dit1::GFP_URA3 |
| 107 | YDP1500  | N44    | MATa         | ho::KANMX | ura3::NATNT2 |             |                |
| 108 | YDP1529  | N44    | MATa         | ho::KANMX | ura3::NATNT2 |             | dit1::GFP_URA3 |
| 109 | NCYC3684 | YPS138 | MATa         | ho::HYGMX | ura3::KANMX  |             |                |
| 110 | YDP1487  | YPS138 | MATa         | ho::HYGMX | ura3::NATNT2 |             |                |
| 111 | YDP1470  | YPS138 | MATa         | ho::KANMX | ura3::NATNT2 |             |                |
| 112 | YDP1469  | YPS138 | MATa         | ho::HYGMX | ura3::NATNT2 |             | dit1::GFP_URA3 |
| 113 | YDP1498  | YPS138 | MATa         | ho::KANMX | ura3::NATNT2 |             | dit1::GFP_URA3 |
| 114 | YDP1478  | Y55    | MATa         | ho        |              |             | NATNT2_CLB2    |
| 115 | YDP1479  | N17    | MAT $\alpha$ | ho        |              |             | NATNT2_CLB2    |
| 116 |          |        |              |           |              |             |                |
| 117 |          |        |              |           |              |             |                |

118 **S2 Table.** Starting strains used to generate spore-autonomous fluorescent protein  
119 expression strains.

| primer | sequence (5' to 3')                                                                       |
|--------|-------------------------------------------------------------------------------------------|
| P0255  | cgtacgctgcaggtcgac                                                                        |
| P0256  | atcogatgaattcgagctcg                                                                      |
| P0881  | TGTGGCTGGGTTTTCAGGGTCCACTACTTTTCTTCCcgtacgctgcaggtcgac                                    |
| P0882  | TTTTCGTCATTATAAAAAATCATACGACCGAGATCCCGGatcgatgaattcgagctcg                                |
| P0889  | GACCATCAAAGAGGTTAATGTGGCTGTGGTTTCAGGGTTCcgtacgctgcaggtcgac                                |
| P0890  | TTTTCGTCATTATAAAAAATCATACGACCGAGATCCCGGatcgatgaattcgagctcg                                |
| P0897  | GCTATTTGGATTTTATATATGACTTTCATTTAACATGATcgtacgctgcaggtcgac                                 |
| P0898  | GCTCTACCCATGAACATATCCATTTTGTAAATTCGTGTatcgatgaattcgagctcg                                 |
| P0899  | GCTATTTGGATTTTATATATGACTTTCGTGTACATATGATcgtacgctgcaggtcgac                                |
| P0900  | CGTCTACCCATGAACATATCCATTTTGTAAATTCGTGTatcgatgaattcgagctcg                                 |
| P0906  | CCTCTCGCTTTTTCGGGATACCTTGGCCTGTACACTACATTCgtttcggtgatgacggtgaaaa                          |
| P0908  | TCCCTCGCTTCTACGTTACTTGGCCTGTGCACTACATTCgtttcggtgatgacggtgaaaa                             |
| P0910  | GAAAATATCACTTTACCTGAAGACACCTTTAAATCATATAcgtttcggtgatgacggtgaaaa                           |
| P0912  | GAAAATATCACTTACCTGTAGACACCTTTAAATCATATAcgtttcggtgatgacggtgaaaa                            |
| P0916  | TATCCTAATTCGGTAAAGCTTTGTGAGACATTAACAAAAtggtgagcaagggcgagga                                |
| P0917  | AAAGAACAAAAGGTAGACCAATGTAGCGCTTACTTTAcgtttcggtgatgacggtgaaaa                              |
| P0918  | TAATATTTTACTCGGAAAACCTTTGAAATATAGCAAAAAtggtgagcaagggcgagga                                |
| P0919  | AGGACAAAAGTAAAGCGCTAGCGCTTCTGCTTTATCCcgtttcggtgatgacggtgaaaa                              |
| P0930  | TCCCAGAAGGATTCACGCCAAATGAACACCAACTTTCCcgtttcggtgatgacggtgaaaa                             |
| P0932  | TCCCAGAAGGATTCACGCCAAATGAACACCAACTTTCCcgtttcggtgatgacggtgaaaa                             |
| P0934  | AAAAAGCCTCCATCGGTTTCTAAACGGGCTATACATGCcgtttcggtgatgacggtgaaaa                             |
| P0936  | AAAAAGCCTCCATCGGTTTCTAAACGGGCTATACATGCcgtttcggtgatgacggtgaaaa                             |
| P0938  | CGCCAAATCGTTGCTGCTTGTGACAGTCCCTAAGTACggtttcggtgatgacggtgaaaa                              |
| P0940  | TGCCAAATCATTTGTTGTCCTGTGTAGATCTTCTAAGTACggtttcggtgatgacggtgaaaa                           |
| P0956  | ACATCAACGTTAATGCTTATGGTACGAAAATTTAAGCTAaggagggacaataatcgcaagg                             |
| P0957  | TGTAATTCGGGGTACTTTACCCTTACTCGTTCGTGACAGTTGcgtttcggtgatgacggtgaaaa                         |
| P0958  | ACATCAACGTTAATGCTTATGGTACGAAAATTTAAGCTAagggtggacaataatcgcaagg                             |
| P0959  | TGTAATTCGGGGTACTTTACCCTTACTCGTTCGTGACAGTTGcgtttcggtgatgacggtgaaaa                         |
| P0960  | CCCTTTCACAAGGAATCTGAAGAATTTGTAGCACCTTTCaaggagggacaataatcgcaagg                            |
| P0961  | TTCTTTTACAAGGAATCTGAAGAATTTGTAGCATCTTTCaagggtggacaataatcgcaagg                            |
| P0962  | CAAAGCGGATTTGGTGGCAATCTGACTGCTGCTTTGGGCAaggagggacaataatcgcaagg                            |
| P0963  | CAAAGCGGATTTGGGCGCAATCTGACTGCTGCTTTGGGCAagggtggacaataatcgcaagg                            |
| P0964  | TTAAATGATGACGGCGAGAATGGAGACAAATACAAAGTAgggagggacaataatcgcaagg                             |
| P0965  | GATTACCACCAACGCTGCTGATCATCAAGCCCAACATATGcgtttcggtgatgacggtgaaaa                           |
| P0966  | TTAAATGATGACGGTGCAGAATGGAGACAAATACAAAGTAggggtggacaataatcgcaagg                            |
| P0967  | GGTTACCACCAACGCTGCTGATCATCAAGCCCAACATATGcgtttcggtgatgacggtgaaaa                           |
| P0968  | ATGCCGCTATATAGAGCAATGATGACTTAATACGCAGTAgggagggacaataatcgcaagg                             |
| P0969  | ATGCCGCTATATAGAGCAATGATGACTTAATACGCAGTAggggtggacaataatcgcaagg                             |
| P0970  | TTACGACGTAATACCTTTCACAATTTACGGTTGGAACAATaggagggacaataatcgcaagg                            |
| P0971  | TTACGACCTTAATGCTTTTACAATTTATCGGTTGGAACAATagggtggacaataatcgcaagg                           |
| P0972  | ATGACTCGTGATACCCCTGAAGATGTCAGCACTGACAGTAgggagggacaataatcgcaagg                            |
| P0973  | ATGACTCGTGATACACCCGAAGATGTCAGTACTGACAGGCGagggtggacaataatcgcaagg                           |
| P0974  | TCCCTGTACAGTGCAGACGCTGGCCATCATAGATTCcaggagggacaataatcgcaagg                               |
| P0975  | AATAATCCACTGAGGCAATTTAGGTAATCCAAACATTTAcgtttcggtgatgacggtgaaaa                            |
| P0976  | TCCTCTGTACAAGTGCAGACGCTGGCCATCATAGATTCcagggtggacaataatcgcaagg                             |
| P0977  | GACGTGATTAAGGTGCTCCTTGTTCGGTTTCTAGTCTTAGaggagggacaataatcgcaagg                            |
| P0978  | GACGTGATTAAGGTGCTCCTTGTTCAGTATCAGTCTTGGagggtggacaataatcgcaagg                             |
| P0979  | TAATGACACGAAACCACTGTAAGCAAGTACAGAGAAAaggagggacaataatcgcaagg                               |
| P0980  | GGTCAATCACACTATAACCACTATGTATATTTCCAGcgtttcggtgatgacggtgaaaa                               |
| P0981  | TAATGACACGAAACCACTGTAAGCAAGTACAGAGAAAagggtggacaataatcgcaagg                               |
| P0982  | AGCAGTGCAAAACAAGAGGTTGAAATTTACAGGTCGAAaggagggacaataatcgcaagg                              |
| P0983  | GATTCCTGAGGTTCCAGGTTCCACCAAGACACGATAAACcgtttcggtgatgacggtgaaaa                            |
| P0984  | AGCAGTGCAAAACAAGAGGTTAAAATTTACAGGTCGAAagggtggacaataatcgcaagg                              |
| P0985  | TCAAATGTTCTTTGTACCTCTTAGGAAGAGTGGACAGTATTagggagggacaataatcgcaagg                          |
| P0986  | AAGTCACTGCTTTGATTTCTGCCGCACCAAGGACTCCAGcgtttcggtgatgacggtgaaaa                            |
| P0987  | TCAAATGTTCTTTGTACTTCTCAGGAAGAGTGGACAGTATTaggggtggacaataatcgcaagg                          |
| P0988  | AAGTGACTTGTCTTATTTCCGCCGCACCAAGGACTCCAGcgtttcggtgatgacggtgaaaa                            |
| P0989  | ACCACATTTCTCAGTGCATGACATGCTACTTCTTCTTGGGATAaggagggacaataatcgcaagg                         |
| P0990  | ACCACATTTCTCAGTGCATGACATGCTACTTGGCATGagggtggacaataatcgcaagg                               |
| P0991  | TGTTGAGGCAAGCTTACTAAAAATTTGTCTAGCTTTAAATTagggagggacaataatcgcaagg                          |
| P0992  | CCACTTGGCCTATCGTACACAACCTCAATTGCACATGCTCCcgtttcggtgatgacggtgaaaa                          |
| P0993  | TGTTGAGGCAAGCTTACTAAAAATTTGTCTAGCTTTAAATTaggggtggacaataatcgcaagg                          |
| P0996  | CTGCTATTTAAGCTTTAGCCATAATCAAACACTAcgtttcggtgatgacggtgaaaa                                 |
| P0997  | TCTGCACTATTAACCTCTTTAACCAATAGTCAAAGACTAcgtttcggtgatgacggtgaaaa                            |
| P0998  | CATAATTCCTGGCATATGTTTACCACAATTCCAATAATTCggtttcggtgatgacggtgaaaa                           |
| P1012  | CCCACTATTTACCTCGGCCAAGAAATAATAGAAATTTATTTTcgtacgctgcaggtcgac                              |
| P1013  | CCTACGTTATTTCTGTAAGAAATGGCAGAAATTTCTGTcgtacgctgcaggtcgac                                  |
| P1014  | GACACGATAACACTTGGCCCTGTTTTTGAATAAGATTTGcattacaacaggtgtgtcctc                              |
| P1015  | GATAACAAAACACTTGCACCTATTTTTTGAATAAAAACCGcattacaacaggtgtgtcctc                             |
| P1018  | TGTGGCTGTGGTTTTTCAGGGTCCACTACTTTTCTTTTCcgtacgctgcaggtcgac                                 |
| P1019  | TTTTCGTCATTATAAAAAAGCATACGACCGAGACTCCCGGcattacaacaggtgtgtcctc                             |
| P1020  | GGAAAAATACAGATTTATTTGTTGATATATTTAAAAATCATACAGTACACCAAGCGGTAcgtacgctgcaggtcgac             |
| P1021  | TCGCCGTTTCTTTAACCATTTGTGCTCCTTTCTTAAGTTATGTGACGGCTTCGTACCATctataagatcaatgaagagagagagggg   |
| P1022  | GGAAAACTTATAAGTTFCAGTGTATATATTTAAAGTACACGCATACCGCAAGGAGTAcgtacgctgcaggtcgac               |
| P1024  | TCACGCTTTGTATGTTGTCGAAAATTTGTAAACGTAAAAaggagggacaataatcgcaagg                             |
| P1025  | CAAGGACGCATTCACAGGAGGTCGTTTCATGTACCGGTTTCggtttcggtgatgacggtgaaaa                          |
| P1030  | TCACGCTTTGTATGTTGTCGAAAATTTGTAAACGTAAAAagggtggacaataatcgcaagg                             |
| P1031  | CAAAGACGCATTCACAGGAGGTCATTCATGTACCGGTTTCggtttcggtgatgacggtgaaaa                           |
| P1031s | CAAAGATGCATTCACAGGAGGTCATTCATGTACCGGTTTCggtttcggtgatgacggtgaaaa                           |
| P1036  | CGTAAAAATAAACAGTCTGTTAATAATTTTACTCGGAAAAGCTTAAAAATTTAGCAAAAAtggtgagcaagggcgagga           |
| P1037  | ACTAATAATTTAAGTAAAGACAAAAGTAAAGCGGCTTACGCTGCTGCTCATACcgtttcggtgatgacggtgaaaa              |
| P1038  | TCGCCGTTTCTTCAACCATTTGTGCTCCTTTCTTAAGTTATGTGAGGGCTTCGTACCATctataaaatcaatcaaaagggggatagggg |
| P1047  | ATGCCGCTATATAGAGCAAAATGATGACTTAATACGCAATaggagggacaataatcgcaagg                            |
| P1053  | TAATGACACAGGAACCACTGTAAGCAGGTACAGAGAAAaggagggacaataatcgcaagg                              |
| P1057  | TGTGGCTGTGGTTTTTCAGGATCCACTACTTTTCTTTTCcgtacgctgcaggtcgac                                 |
| P1058  | TTTTCGTCATTATAAAAAATCATACGACCGAGATCCCGGcattacaacaggtgtgtcctc                              |
| P1059  | TAATATTTTACTCGGAAAAGCTTTGAAATATAGCAAAAAtggtgagcaagggcgagga                                |
| P1060  | AAGACAAAAGTAAAGCGGCTGGCGCTGCTGTTTATCCcgtttcggtgatgacggtgaaaa                              |
| P1067  | TCACGCTTTGTATGTTGTCGAAAATTTGTAAACGTAAAAaggagggacaataatcgcaagg                             |

|       |                                                                   |
|-------|-------------------------------------------------------------------|
| P1068 | ACATCAACGTTAATGCTTATGGTGACGAAAAATTAACGTAaggagggacaattatcgcaaagg   |
| P1069 | TGTATTCGGGGTACTTTACCTTTACTCGTTCGTGCAGTTGcgtttcggtgatgacggtgaaaa   |
| P1070 | CCCTTTCACAAGGAATCTGAAGAATTTGTAGCACCTTTCAaggagggacaattatcgcaaagg   |
| P1071 | GAAAAATATCACCTTTACCTGTAGACACCTTTAAATCATATAcgtttcggtgatgacggtgaaaa |
| P1072 | CAAAGCGGATTTGGTGGCAATCTGACTGCTGCTTTGGGCAaggagggacaattatcgcaaagg   |
| P1073 | ATGCGCGTATATAGAGCAATTGATTGACTTAATACGCAGTtaggagggacaattatcgcaaagg  |
| P1074 | TTACGACAGTAATACCTTTACAATATCGGTTGGAACAATaggagggacaattatcgcaaagg    |
| P1075 | CCTCTCGCCTTTTGGCTTACTTGGCCTGTACACTACATTCgtttcggtgatgacggtgaaaa    |
| P1076 | ATGACTCGTGATACCCCTGAAGATGTCAGCACTGCAGGTGaggagggacaattatcgcaaagg   |
| P1077 | CGCCAAATTTGTTGCTGTCCTTGTGCAGATCCTTAACCTGAcgtttcggtgatgacggtgaaaa  |
| P1078 | TCCTCTGTACGAGTCGCAGACGTGGCCATCATAGATTCCcaggagggacaattatcgcaaagg   |
| P1079 | GACGTGATTAGGGTGGTCTTGTTCAGTTTCAGTCTTAGaggagggacaattatcgcaaagg     |
| P1080 | TCTGCATTATTAACCTCTTTAGCCAATGATCAAAACACTAcgtttcggtgatgacggtgaaaa   |
| P1081 | TAATGACACAGGAACCACGTGTAAGCAAGTACAGAGAAAAaggagggacaattatcgcaaagg   |
| P1082 | GGTCAATCACACTCATAACCACATCTATGTATATCCAGcgtttcggtgatgacggtgaaaa     |
| P1083 | AGCAGTCAAAAACAAGAGGGTTGAAATTATCAGGTCGCAaggagggacaattatcgcaaagg    |
| P1084 | TCAATGTTCTTTGTACCTCTTAGGAAGAGTGGCAGTATTaggagggacaattatcgcaaagg    |
| P1085 | ATCACATTCTCAGTGCATGCCTACTTCTTCTGGGATAaggagggacaattatcgcaaagg      |
| P1086 | TGTTGAGGCAAGCTTACTAAAAATTTGTCTAGCTTAAATTaggagggacaattatcgcaaagg   |
| P1097 | TGTGGACATTACACTACGTCAAGAATCCGAAGATATCAaggagggacaattatcgcaaagg     |
| P1099 | CACTTGTATATTGTCTCCATTTGACACCTGCATCAATTAacgtttcggtgatgacggtgaaaa   |

120  
121  
122  
123  
124  
125  
126  
127  
128  
129  
130  
131  
132  
133  
134  
135  
136  
137  
138  
139  
140  
141  
142  
143

**S3 Table.** Primers used in this study.

**Supporting References**

S1. Hou J, Friedrich A, De Montigny J, Schacherer J. Chromosomal rearrangements as a major mechanism in the onset of reproductive isolation in *Saccharomyces cerevisiae*. *Curr Biol* 2014;24:1153–9.

S2. Strobe PK, Skelly DA, Kozmin SG, Mahadevan G, Stone EA, Magwene PM, et al. The 100-genomes strains, an *S. cerevisiae* resource that illuminates its natural phenotypic and genotypic variation and emergence as an opportunistic pathogen. *Genome Res* 2015;125:762–74.

S3. Pérez-Ortín JE, Querol A, Puig S, Barrio E. Molecular characterization of a chromosomal rearrangement involved in the edaptive evolution of yeast strains. *Genome Res* 2002;1533–9.

S4. Liti G, Barton DBH, Louis EJ. Sequence diversity, reproductive isolation and species concepts in *saccharomyces*. *Genetics* 2006;174:839–50.

S5. Bertels F, Silander OK, Pachkov M, Rainey PB, Van Nimwegen E. Automated reconstruction of whole-genome phylogenies from short-sequence reads. *Mol Biol Evol* 2014;31:1077–88.

S6. Ma C, Mortimer RK. Empirical equation that can be used to determine genetic map distances from tetrad data. *Mol Cell Biol* 1983; 3:1886-87.



- 144 S7. Thacker D, Lam I, Knop M, Keeney S. Exploiting spore-autonomous fluorescent  
145 protein expression to quantify meiotic chromosome behaviors in *Saccharomyces*  
146 *cerevisiae*. *Genetics* 2011;189:423–39.
- 147 S8. Cubillos FA, Louis EJ, Liti G. Generation of a large set of genetically tractable haploid  
148 and diploid *Saccharomyces* strains. *FEMS Yeast Res* 2009;9:1217–25.
- 149 S9. Marston AL, Tham WH, Shah H, Amon A. A genome-wide screen identifies genes  
150 required for centromeric cohesion. *Science* 2004;303:1367–70.
- 151 S10. Enyenihi AH, Saunders WS. Large-scale functional genomic analysis of sporulation  
152 and meiosis in *Saccharomyces cerevisiae*. *Genetics* 2003;163:47–54.
- 153 S11. Amin AD, Chaix ABH, Mason RP, Badge RM, Borts RH. The roles of the  
154 *Saccharomyces cerevisiae* RecQ helicase SGS1 in meiotic genome surveillance.  
155 *PLoS One* 2010;5:e15380.
- 156 S12. Darling ACE, Mau B, Blattner FR, Perna NT. Mauve: Multiple alignment of conserved  
157 genomic sequence with rearrangements. *Genome Res* 2004;14:1394-1403.
